# Supplementary material for: Reciprocal signaling and direct physical interactions between fibroblasts and breast cancer cells in a 3D environment
Source: PubMed Central journal article supplement (PMC6590889; doi:10.1371/journal.pone.0218854), 2019-06-24
Supplement: pone.0218854.s001.pdf [file pone.0218854.s001.pdf]

**Supplemental Table S1.** Primers used for qRT-PCR and plasmid construction in this study.

| <b>Primer</b> | <b>Sequence (5' to 3')</b>                          |
|---------------|-----------------------------------------------------|
| ACTA-f        | GTGACGAAGCACAGAGCAAA                                |
| ACTA-r        | CTTTTCCATGTCGTCCCAGT                                |
| DDR2-f        | TTTGGGGAGGTTTCATCTCTG                               |
| DDR2-r        | ATTTTCACAGCCACCAGGAC                                |
| Desmin-f      | AGGCAGCCAACAAGAACAAC                                |
| Desmin-r      | GCCTCATCAGGGAATCGTTA                                |
| FAP-f         | TTCATGATGGACGCACTGAT                                |
| FAP-r         | TTCCTCTTTAGGCAGCTGGA                                |
| PDGFA-f       | AGTCAGGGGAAACGATTGTG                                |
| PDGFA-r       | TGCCTTTGCCTTTCACCTTCT                               |
| PDGFRB-f      | ACGAGAAGAAAGGGGACGTT                                |
| PDGFRB-r      | CAATGGTGGTTTTGCAGATG                                |
| S100A4-f      | AGCTTCTTGGGGAAAAGGAC                                |
| S100A4-r      | TCTTGGAAGTCCACCTCGTT                                |
| Vim-f         | CGAAAACACCCTGCAATCTT                                |
| Vim-r         | ATTCCACTTTGCGTTCAAGG                                |
| podoplanin-f  | CTGCTCTTCGTTTTGGGAAG                                |
| podoplanin-r  | TTCCTGGAGTCACCACATCA                                |
| syndecan-f    | TGCTGTACCGCATGAAGAAG                                |
| syndecan-r    | GCATAGAATTCCTCCTGTTTGG                              |
| GAPDH-f       | AATGACCCCTTCATTGACCTC                               |
| GAPDH-r       | TGGAAGATGGTGATGGGATT                                |
| FAP-1         | TATA <u>ACCGGT</u> ATGAAGACTTGGGTAAAAATCGTAT        |
| FAP-2         | ATAT <u>GTCGACCT</u> AGTCTGACAAAGAGAAACTGCTT        |
| mCherry-1     | TATA <u>ACCGGT</u> ATGGTTTCAAAGGTGAAGAAG            |
| mCherry-2     | ATAT <u>AGATCT</u> TTTTATATAATTCATCCATACC           |
| PDPN-1        | TATA <u>ACCGGT</u> ATGTGGAAGGTGTCAGCTCTGCTCTTC      |
| PDPN-2        | ATAT <u>GTCGACCT</u> AGGGCGAGTACCTTCCCGACATTTTTTCGC |
